# Supplementary material for: On the Structure of Ultrathin FeO Films on Ag(111)
Source: MDPI journal article supplement (doi:10.3390/nano8100828), 2018-10-13
Supplement: s1 [file s1]

## Supplementary Materials

**SM1. Overview of the literature data concerning the preparation of iron oxide films on silver single crystal supports (chronological order).**

| Ref. | Iron Oxide                                                                                            | Support | Preparation Procedure                                                                                                                                                                      | Authors' Description                                                                                                                                                                                             | Methods          |
|------|-------------------------------------------------------------------------------------------------------|---------|--------------------------------------------------------------------------------------------------------------------------------------------------------------------------------------------|------------------------------------------------------------------------------------------------------------------------------------------------------------------------------------------------------------------|------------------|
| [1]  | FeO(111),<br>Fe <sub>3</sub> O <sub>4</sub> (111)                                                     | Ag(111) | Repeated cycles of submonolayer iron deposition and oxidation: FeO(111) for initial 3–4 MLs, Fe <sub>3</sub> O <sub>4</sub> (111) for thicker films                                        | No detailed description                                                                                                                                                                                          | LEED, XPS, XPD   |
| [2]  | FeO(111) (<6 ML), Fe <sub>3</sub> O <sub>4</sub> (111) (>6 ML) (also denoted as "FeO <sub>x</sub> ")  | Ag(111) | 1–10 MLs Fe at RT<br>10 <sup>-5</sup> Torr O <sub>2</sub> at 350 °C for 15 min<br>Cooled down in O <sub>2</sub> to 200 °C<br>UHV annealed at 400 °C for 30 min                             | Poorly ordered FeO(111), broadening of LEED spots and background increase, XPS indicated mixed FeO and Fe <sub>3</sub> O <sub>4</sub> oxide phases or non-stoichiometric oxides                                  | LEED, XPS, XPD   |
| [2]  | FeO(111) (<10 Å), Fe <sub>3</sub> O <sub>4</sub> (111) (>10 Å) (also denoted as "FeO <sub>x</sub> ")  | Ag(111) | Multiple cycles ≤0.5 ML Fe at RT<br>Heat to 150 °C (prior to O <sub>2</sub> introduction)<br>10 <sup>-5</sup> Torr O <sub>2</sub> at 150 °C for 5 min<br>UHV annealed at 400 °C for 30 min | Good crystalline quality FeO(111), "split" LEED beams for FeO(111), (2×2) LEED for Fe <sub>3</sub> O <sub>4</sub> , for thicker films<br>XPS indicated mixed FeO and Fe <sub>3</sub> O <sub>4</sub> oxide phases | LEED, XPS, XPD   |
| [3]  | FeO(001)                                                                                              | Ag(001) | 22 MLs <sup>57</sup> Fe at RT in 1 × 10 <sup>-7</sup> mbar O <sub>2</sub><br>UHV annealed at 600 °C for 10 min                                                                             | Stoichiometric FeO(001) with good crystalline quality, well defined LEED, only Fe <sup>2+</sup> in XPS, ~15% of Fe <sub>3</sub> O <sub>4</sub> underneath FeO                                                    | LEED, Mössbauer  |
| [4]  | FeO(001), FeO(111)                                                                                    | Ag(001) | Not mentioned                                                                                                                                                                              | Nearly bulk terminated FeO(001) and FeO(111)                                                                                                                                                                     | LEED             |
| [5]  | FeO(111) (<10 Å), Fe <sub>3</sub> O <sub>4</sub> (111) (>10 Å), Fe <sub>2</sub> O <sub>3</sub> (0001) | Ag(111) | Multiple cycles of Fe deposition (amount not indicated) at                                                                                                                                 | FeO(111) with lattice constant close to bulk                                                                                                                                                                     | LEED, XRD, Raman |

|      |                                                                                                                                                   |         |                                                                                                                                                                                                                                                                                                                                                                                                                   |                                                                                                                                                                                |                               |
|------|---------------------------------------------------------------------------------------------------------------------------------------------------|---------|-------------------------------------------------------------------------------------------------------------------------------------------------------------------------------------------------------------------------------------------------------------------------------------------------------------------------------------------------------------------------------------------------------------------|--------------------------------------------------------------------------------------------------------------------------------------------------------------------------------|-------------------------------|
|      | (from Fe <sub>3</sub> O <sub>4</sub> (111))                                                                                                       |         | temperatures from RT to 150 °C<br>Oxidation:<br>2 × 10 <sup>-6</sup> mbar O <sub>2</sub> at temperatures up to 400 °C (FeO(111))<br>5 × 10 <sup>-6</sup> mbar O <sub>2</sub> at 150 °C for 15 min (Fe <sub>3</sub> O <sub>4</sub> (111)),<br>UHV annealed at >350 °C<br>9 × 10 <sup>-6</sup> mbar O <sub>2</sub> at 450 °C (flash) (Fe <sub>3</sub> O <sub>4</sub> (111) → Fe <sub>2</sub> O <sub>3</sub> (0001)) | value, well ordered epitaxial Fe <sub>3</sub> O <sub>4</sub> (111) and Fe <sub>2</sub> O <sub>3</sub> (0001) films in two domains                                              |                               |
| [6]  | FeO(111) (<10 Å), Fe <sub>3</sub> O <sub>4</sub> (111) (>10 Å), Fe <sub>2</sub> O <sub>3</sub> (0001) (from Fe <sub>3</sub> O <sub>4</sub> (111)) | Ag(111) | Same as in Ref. [4]                                                                                                                                                                                                                                                                                                                                                                                               | This article is an extended version of Ref. [4], phase transformations between Fe <sub>2</sub> O <sub>3</sub> and Fe <sub>3</sub> O <sub>4</sub> possible                      | SXRD, LEED, Raman             |
| [7]  | FeO(001), FeO(111), Fe <sub>3</sub> O <sub>4</sub> (001)                                                                                          | Ag(001) | Fe deposition at RT<br>10 <sup>-5</sup> mbar O <sub>2</sub> at 300 °C for 1h                                                                                                                                                                                                                                                                                                                                      | FeO(001) wetting the surface, Fe <sub>3</sub> O <sub>4</sub> (001)-like structure, quasi-hexagonal FeO(111)                                                                    | LEED, STM, XPS                |
| [7]  | FeO(111)                                                                                                                                          | Ag(001) | Fe deposition at 200–400 °C in 10 <sup>-5</sup> mbar O <sub>2</sub>                                                                                                                                                                                                                                                                                                                                               | Quasi-hexagonal FeO(111)                                                                                                                                                       | LEED, SPA-LEED, XPS, AES, STM |
| [8]  | FeO(100), Fe <sub>3</sub> O <sub>4</sub>                                                                                                          | Ag(100) | 4–80 MLs <sup>57</sup> Fe deposition at RT (or higher) in 5.0 × 10 <sup>-8</sup> mbar to 4.6 × 10 <sup>-7</sup> mbar O <sub>2</sub><br>UHV annealed at 420–660 °C for 1–7 min                                                                                                                                                                                                                                     | Well defined FeO/Fe <sub>3</sub> O <sub>4</sub> samples with different phase content ratio                                                                                     | XPS, Mössbauer, LEED          |
| [9]  | FeO(111)                                                                                                                                          | Ag(001) | 0.5 ML at 570 K in 10 <sup>-5</sup> mbar O <sub>2</sub>                                                                                                                                                                                                                                                                                                                                                           | Quasi-hexagonal FeO(111)                                                                                                                                                       | XPS, STM, LEED                |
| [10] | FeO(111), mixed FeO(111)/FeO(100), Fe <sub>2</sub> O <sub>3</sub>                                                                                 | Ag(100) | Fe deposition at 25–400 °C in 2 × 10 <sup>-7</sup> mbar, 1 × 10 <sup>-6</sup> mbar and 5 × 10 <sup>-6</sup> mbar O <sub>2</sub>                                                                                                                                                                                                                                                                                   | ML FeO(111) with FeO(100)-like grain boundaries, mixed FeO(111)/FeO(100) structure, hexagonal multilayer with buckled top layer — attributed to Fe <sub>2</sub> O <sub>3</sub> | STM, LEED, XPS, NEXAFS        |
| [11] | α-Fe <sub>2</sub> O <sub>3</sub> (0001), Fe <sub>3</sub> O <sub>4</sub> (111)                                                                     | Ag(111) | Cycles of 7–9 MLs Fe deposition at RT                                                                                                                                                                                                                                                                                                                                                                             | Well-ordered films, phase                                                                                                                                                      | LEEM, LEED                    |

|                                      |                                                                                                                       |                  |                                                                                                                                                                       |                                                                                                                                                      |                              |
|--------------------------------------|-----------------------------------------------------------------------------------------------------------------------|------------------|-----------------------------------------------------------------------------------------------------------------------------------------------------------------------|------------------------------------------------------------------------------------------------------------------------------------------------------|------------------------------|
|                                      |                                                                                                                       |                  | $2 \times 10^{-6}$ mbar O <sub>2</sub> at 720 K (Fe <sub>3</sub> O <sub>4</sub> )<br>$2.4 \times 10^{-5}$ mbar at 670 K (Fe <sub>2</sub> O <sub>3</sub> )             | transformations possible                                                                                                                             |                              |
| [12]                                 | FeO(111), FeO(100)<br>(also denoted as "FeO <sub>x</sub> ")                                                           | Ag(100)          | 0.4-2.0 MLs at 100 °C in $1 \times 10^{-5}$ mbar to $2 \times 10^{-7}$ mbar O <sub>2</sub> UHV annealed at 400 °C for 2 min                                           | p(2×11) / c(2×12) unit cell coincidence structures, multilayer FeO                                                                                   | STM, LEED, XPS, NEXAFS       |
| [13]                                 | α-Fe <sub>2</sub> O <sub>3</sub> (0001), γ-Fe <sub>2</sub> O <sub>3</sub> (111), Fe <sub>3</sub> O <sub>4</sub> (111) | Ag(111)          | Same as in Ref. [10], $3 \times 10^{-5}$ mbar at <620 K for 10 min (γ-Fe <sub>2</sub> O <sub>3</sub> (111))                                                           | Well-ordered films, transformations between phases possible                                                                                          | LEEM, LEED, XPEEM            |
| [Error! Reference source not found.] | Fe <sub>3</sub> O <sub>4</sub> (111)                                                                                  | Ag(001)          | Fe deposition at RT in $2 \times 10^{-6}$ mbar O <sub>2</sub> UHV annealed at 675 K                                                                                   | Fe <sub>3</sub> O <sub>4</sub> (111) growing in two crystallographic domains                                                                         | LEED, SXRD, STM              |
| [14]                                 | Fe <sub>3</sub> O <sub>4</sub> (001)                                                                                  | Ag(001)          | Fe deposition at RT $\sim 10^{-6}$ mbar O <sub>2</sub> at RT for 10 min $\sim 2 \times 10^{-7}$ mbar O <sub>2</sub> at 650 K for 30 min                               | Fe <sub>3</sub> O <sub>4</sub> (001) with a ( $\sqrt{2} \times \sqrt{2}$ )R45° reconstruction                                                        | LEED, SXRD, STM              |
| [14]                                 | Fe <sub>3</sub> O <sub>4</sub> (001)                                                                                  | Ag(001)          | Fe deposition at RT $\sim 3 \times 10^{-7}$ mbar O <sub>2</sub> at RT for 10 min $\sim 3 \times 10^{-7}$ mbar O <sub>2</sub> at 650 K for 30 min and 770 K for 30 min | Seed layer for the growth of a well-ordered (001) magnetite layer                                                                                    | LEED, SXRD, STM              |
| [15]                                 | FeO(111), Fe <sub>3</sub> O <sub>4</sub> (111), multilayer FeO <sub>x</sub>                                           | Ag(111)          | Fe deposition at various substrate temperatures (RT to 773 K) in $2 \times 10^{-7}$ Torr to $1 \times 10^{-6}$ Torr O <sub>2</sub>                                    | FeO(111) with a p(9×9) Moiré superstructure, Fe <sub>3</sub> O <sub>4</sub> (111), FeO(111)-like multilayer structure denoted as "FeO <sub>x</sub> " | LEED, TPD, RAIRS             |
| [16]                                 | FeO(111)                                                                                                              | Ag(100)          | Same as in Ref. [11]                                                                                                                                                  | Same as in Ref. [11]                                                                                                                                 | STM, LEED, RAIRS, TPD, DFT+U |
| [17]                                 | FeO(111)                                                                                                              | Ag(100), Ag(111) | Fe deposition at 100 °C in $2 \times 10^{-7}$ mbar O <sub>2</sub> UHV annealed at 400 °C                                                                              | Monolayer FeO(111) with coincidence structures same as in Ref. [15]                                                                                  | STM, LEED, SXRD, TPD, RAIRS  |

|           |                                                   |         |                                                                                       |                                                                                                                                  |                   |
|-----------|---------------------------------------------------|---------|---------------------------------------------------------------------------------------|----------------------------------------------------------------------------------------------------------------------------------|-------------------|
| This work | FeO(111)                                          | Ag(111) | 1 ML Fe at RT<br>$1 \times 10^{-6}$ mbar O <sub>2</sub> at 700 K<br>for 30 min        | 30°-rotated 14×14<br>FeO on $9\sqrt{3} \times 9\sqrt{3}$<br>Ag Moiré<br>superstructure<br>and various ill-<br>defined structures | STM,<br>LEED, XPS |
| This work | FeO(111),<br>Fe <sub>3</sub> O <sub>4</sub> (111) | Ag(111) | 1 ML Fe at 500–600 K<br>$1 \times 10^{-6}$ mbar O <sub>2</sub> at 700 K<br>for 30 min | Moiré-<br>reconstructed and<br>reconstruction-<br>free,<br>stoichiometric<br>and well-ordered<br>FeO(111)                        | STM,<br>LEED, XPS |

“ML” indicates “monolayers”, “RT” — “room temperature”, “UHV” — ultra-high vacuum. The scientific units are the same as in the original articles.

## References

- Waddill, G.D.; Ozturk, O. Growth of Ultrathin Iron Oxide and Chromium Oxide Films on Ag(001) and Ag(111). In Proceedings of the Annual American Physical Society March Meeting, Indiana Convention Center, Indianapolis, March 18-22, 2002; #H33.095.
- Waddill, G.D.; Ozturk, O. Epitaxial growth of iron oxide films on Ag(111). *Surf. Sci.* **2005**, *575*, 35–50.
- Lopes, E.L.; Abreu, G.J.P.; Paniago, R.; Soares, E.A.; de Carvalho, V.E.; Pfannes, H.-D. Atomic geometry determination of FeO(001) grown on Ag(001) by low energy electron diffraction. *Surf. Sci.* **2007**, *601*, 1239–1245.
- Lopes, E.L.; Abreu, G.J.P.; Paniago, R.; Soares, E.A.; Pfannes, H.-D.; de Carvalho, V.E. Low energy electron diffraction analysis of the (001) and (111) surface geometry of FeO films grown on Ag(001) surface. *J. Electr. Spectr. Rel. Phenom.* **2007**, *156*–158.
- Schlueter, C.; Lübke, M.; Gigler, A.M.; Moritz, W. Growth of Iron-Oxides on Ag(111) Surfaces. *Macla* **2010**, *13*, 203–204.
- Schlueter, C.; Lübke, M.; Gigler, A.M.; Moritz, W. Growth of iron oxides on Ag(111)—reversible Fe<sub>2</sub>O<sub>3</sub>/Fe<sub>3</sub>O<sub>4</sub> transformation. *Surf. Sci.* **2011**, *605*, 1986–1993.
- Bruns, D. Structure and morphology of ultrathin iron and iron oxide films on Ag(001). Ph.D. Thesis, Universität Osnabrück, Germany, 2012.
- Abreu, G.J.P.; Paniago, R.; Pfannes, H.-D. Growth of ultra-thin FeO(100) films on Ag(100): A combined XPS, LEED and CEMS study. *J. Magn. Magn. Mater.* **2014**, *349*, 235–239.
- Bruns, D.; Kiesel, I.; Jentsch, S.; Lindemann, S.; Otte, C.; Schemme, T.; Kuschel, T.; Wollschläger, J. Structural analysis of FeO(111)/Ag(001): Undulation of hexagonal oxide monolayers due to square lattice metal substrates. *J. Phys.: Condens. Matter* **2014**, *26*, 315001.
- Ataran, S. Iron Oxide Thin Film Growth On Ag(100). M.Sc. Thesis, Lund University, Sweden, 2014.
- Genuzio, F.; Sala, A.; Schmidt, Th.; Menzel, D.; Freund, H.-J. Interconversion of  $\alpha$ -Fe<sub>2</sub>O<sub>3</sub> and Fe<sub>3</sub>O<sub>4</sub> Thin Films: Mechanisms, Morphology, and Evidence for Unexpected Substrate Participation. *J. Phys. Chem. C* **2014**, *118*, 29068–29076.
- Merte, L.R.; Shipilin, M.; Ataran, S.; Blomberg, S.; Zhang, C.; Mikkelsen, A.; Gustafson, J.; Lundgren, E. Growth of Ultrathin Iron Oxide Films on Ag(100). *J. Phys. Chem. C* **2015**, *119*, 2572–2582.
- Genuzio, F.; Sala, A.; Schmidt, Th.; Menzel, D.; Freund, H.-J. Phase transformations in thin iron oxide films: Spectromicroscopic study of velocity and shape of the reaction fronts. *Surf. Sci.* **2016**, *648*, 177–187.
- Lamirand, A.D.; Grenier, S.; Langlais, V.; Ramos, A.Y.; Tolentino, H.C.N.; Torelles, X.; De Santis, M. Magnetite epitaxial growth on Ag(001): Selected orientation, seed layer, and interface sharpnes. *Surf. Sci.* **2016**, *647*, 33–38.
- Mehar, V.; Merte, L.R.; Choi, J.; Shipilin, M.; Lundgren, E.; Weaver, J.F. Adsorption of NO on FeOx Films Grown on Ag(111). *J. Phys. Chem. C* **2016**, *120*, 9282–9291.

- 
16. Merte, L.R.; Heard, C.J.; Zhang, F.; Choi, J.; Shipilin, M.; Gustafson, J.; Weaver, J.F.; Grönbeck, H.; Lundgren, E. Tuning the Reactivity of Ultrathin Oxides: NO Adsorption on Monolayer FeO(111). *Angew. Chem. Int. Ed.* **2016**, *55*, 9267–9271.
  17. Shipilin, M.; Lundgren, E.; Gustafson, J.; Zhang, C.; Bertram, F.; Nicklin, C.; Heard, C. J.; Grönbeck, H.; Zhang, F.; Choi, J.; et al. Fe Oxides on Ag Surfaces: Structure and Reactivity. *Top. Catal.* **2017**, *60*, 492–502.

## SM2. Detailed X-ray photoelectron spectroscopy data.

| RT-Fe/Ag(111) |                      |                      | HT-Fe/Ag(111)        |                      |
|---------------|----------------------|----------------------|----------------------|----------------------|
| Component     | Fe 2p <sub>3/2</sub> | Fe 2p <sub>1/2</sub> | Fe 2p <sub>3/2</sub> | Fe 2p <sub>1/2</sub> |
| Position (eV) | 706.6                | 719.9                | 706.4                | 719.6                |
| FWMH          | 0.7                  | 2.0                  | 0.87                 | 2.0                  |
| Area          | 181133.3             | 90566.6              | 95668.4              | 47834.2              |

| RT-FeO/Ag(111)    |                      |                     |           |                      |                     |           |         |
|-------------------|----------------------|---------------------|-----------|----------------------|---------------------|-----------|---------|
| Component         | Fe 2p <sub>3/2</sub> |                     |           | Fe 2p <sub>1/2</sub> |                     |           | O 1s    |
|                   | Fe <sup>2+</sup>     | Multiplet splitting | Satellite | Fe <sup>2+</sup>     | Multiplet splitting | Satellite | O(2-)   |
| Position (eV)     | 710.3                | 712.6               | 716.6     | 724.0                | 726.9               | 731.6     | 529.7   |
| FWMH              | 3.0                  | 3.0                 | 0.87      | 3.0                  | 3.0                 | 5.5       | 1.4     |
| Area              | 81849.0              | 40999.9             | 26261.2   | 40924.5              | 20500               | 28222.0   | 79223.4 |
| Concentration (%) | 53.5%                |                     |           |                      |                     |           | 46.5%   |

| HT-FeO/Ag(111)    |                      |                     |           |                      |                     |           |         |
|-------------------|----------------------|---------------------|-----------|----------------------|---------------------|-----------|---------|
| Component         | Fe 2p <sub>3/2</sub> |                     |           | Fe 2p <sub>1/2</sub> |                     |           | O 1s    |
|                   | Fe <sup>2+</sup>     | Multiplet splitting | Satellite | Fe <sup>2+</sup>     | Multiplet splitting | Satellite | O(2-)   |
| Position (eV)     | 710.2                | 712.7               | 716.5     | 724.0                | 726.9               | 731.3     | 529.8   |
| FWMH              | 3.0                  | 3.0                 | 6.0       | 3.0                  | 3.0                 | 6.0       | 1.4     |
| Area              | 63063.1              | 26488.7             | 26113.4   | 31531.6              | 13244.4             | 28222.0   | 55929.4 |
| Concentration (%) | 54.7%                |                     |           |                      |                     |           | 45.3%   |

The fittings confirmed that after the oxidation the iron is in the Fe<sup>2+</sup> oxidation state. The presence of significant amounts of other Fe<sup>2+</sup> containing iron oxide phase—Fe<sub>3</sub>O<sub>4</sub>, can be excluded, as it consists of a mixture of Fe<sup>2+</sup> and Fe<sup>3+</sup> ions [18,19]. Fe<sub>2</sub>O<sub>3</sub>, on the other hand, consists of iron in the Fe<sup>3+</sup> oxidation state only.

## References

- Hawn, D.D.; DeKoven, B.M. Deconvolution as a correction for photoelectron inelastic energy losses in the core level XPS spectra of iron oxides. *Surf. Interface Anal.* **1987**, *10*, 63–74.
- Muhler, M.; Schlögl, R.; Ertl, G. The nature of the iron oxide-based catalyst for dehydrogenation of ethylbenzene to styrene 2. Surface chemistry of the active phase. *J. Catal.* **1992**, *138*, 413–444.

### SM3. Geometrical details of the calculated FeO systems.

Separations of atomic layers along the coordinate perpendicular to the (111) surface plane calculated for the monolayer FeO(111) film on Ag(111), the bilayer FeO(111) on Ag(111) and a free-standing 3-monolayers-thick FeO slab, obtained from GGA+U calculations using 1×1 surface unit cells. The numbering of atomic layers is referenced to the topmost Ag layer. The numbers in brackets refer to the geometrical parameters resulting from structural optimization of the systems constructed using the experimental lattice constant of Ag (round brackets) and PBE+U lattice constant of FeO [square brackets]. In a free-standing 3 MLs FeO slab, the layers are numbered from the top (terminating O layer) to the bottom. In bulk FeO, the in-plane interatomic Fe–Fe and O–O distances are 3.04 Å and the separation of Fe and O planes is 1.25 Å [20]. In the performed calculations, the calculated in-plane lattice constant of FeO is equal to the surface lattice constant of Ag(111) due to the use of a 1×1 computational cell. ~5% contraction of the surface lattice constant with respect to bulk FeO is of much smaller magnitude than those reported for FeO(111) films on other single-crystalline substrates.

| System                            | Layers                    | Separation (all values in Å)                 |
|-----------------------------------|---------------------------|----------------------------------------------|
| <b>Monolayer FeO(111)/Ag(111)</b> | O1-Fe1                    | 0.82 (0.86)                                  |
| <b>Monolayer FeO(111)/Ag(111)</b> | Fe1-Ag1                   | 2.35 (2.36)                                  |
| <b>Bilayer FeO(111)/Ag(111)</b>   | O2-Fe2                    | 0.86 (0.89)                                  |
| <b>Bilayer FeO(111)/Ag(111)</b>   | Fe2-O1                    | 1.44 (1.44)                                  |
| <b>Bilayer FeO(111)/Ag(111)</b>   | O1-Fe1                    | 1.29 (1.33)                                  |
| <b>Bilayer FeO(111)/Ag(111)</b>   | Fe1-Ag1                   | 2.23 (2.26)                                  |
| <b>3-MLs-FeO slab</b>             | O1-Fe1                    | 0.86 [0.79]                                  |
| <b>3-MLs-FeO slab</b>             | Fe1-O2                    | 1.43 [1.41]                                  |
| <b>FeO(111) surface</b>           | In-plane lattice constant | PBE: 2.938 (fixed)<br>[PBE+U: 3.032] (fixed) |

### References

- Kim, Y.J.; Westphal, C.; Ynzunza, R.X.; Galloway, H.C.; Salmeron, M.; van Hove, M.A.; Fadley, C.S. Interlayer interactions in epitaxial oxide growth: FeO on Pt(111). *Phys. Rev. B* **1997**, *55*, R13448–R13451.

**SM4. Calculated Bader charges and magnetic moment on atoms.**

Bader charges and magnetic moments on atoms within different layers. The charge on atom is calculated as the difference between the calculated Bader charge on atom of a given layer minus the charge on respective Fe (6.55 |e|) or O (7.45 |e|) atom in bulk FeO and on Ag1 atom of the clean Ag(111) slab (11.02 |e|), respectively. The magnetic moment on individual Fe atoms of bulk FeO is  $\pm 3.65 \mu_B$  and zero on O atoms. The labeling of the layers refers to that shown in Figure 6 in the main text. The entries in the column labeled as “3 ML slab” refer to the free-standing 3-MLs-thick FeO(111) slab, calculated using the PBE lattice constant of Ag and the PBE+U lattice constant of FeO.

| Layer | Bader Charge (in  e ) |       |               | Magnetic Moment ( $\mu_B$ ) |       |               |
|-------|-----------------------|-------|---------------|-----------------------------|-------|---------------|
|       | 1 ML                  | 2 ML  | 3 ML slab     | 1 ML                        | 2 ML  | 3 ML slab     |
| O3    |                       |       | -0.25 (-0.23) |                             |       | 0.46 (0.44)   |
| Fe3   |                       |       | -0.43 (-0.44) |                             |       | 4.16 (4.18)   |
| O2    |                       | -0.25 | -0.04 (-0.06) |                             | 0.45  | 0.07 (0.09)   |
| Fe2   |                       | -0.41 | -0.02 (0.00)  |                             | 4.15  | -3.60 (-3.58) |
| O1    | -0.24                 | -0.07 | -0.03 (-0.05) | 0.39                        | 0.05  | 0.00 (0.01)   |
| Fe1   | 0.04                  | 0.51  | 0.76 (0.78)   | 3.85                        | -3.41 | 3.48 (3.48)   |
| Ag1   | 0.17                  | 0.19  |               | 0.00                        | 0.02  |               |

**SM5. Calculated work function values.**

| Calculated Work Function Values (eV)                                    |      |
|-------------------------------------------------------------------------|------|
| Ag(111) (1×1)                                                           | 4.49 |
| 1ML FeO/Ag(111)-FM (1×1)                                                | 6.56 |
| 1ML FeO/Ag(111)-FM ( $\sqrt{3}\times\sqrt{3}$ )                         | 6.57 |
| 1ML FeO/Ag(111)-AFM (same result for 1×1 and $\sqrt{3}\times\sqrt{3}$ ) | 5.87 |
| 2ML FeO/Ag(111)-AFM (1×1)                                               | 6.67 |
| 2ML FeO/Ag(111)-AFM ( $\sqrt{3}\times\sqrt{3}$ )                        | 6.69 |
| 3ML FeO slab-AFM (same result for 1×1 and $\sqrt{3}\times\sqrt{3}$ )    | 6.95 |



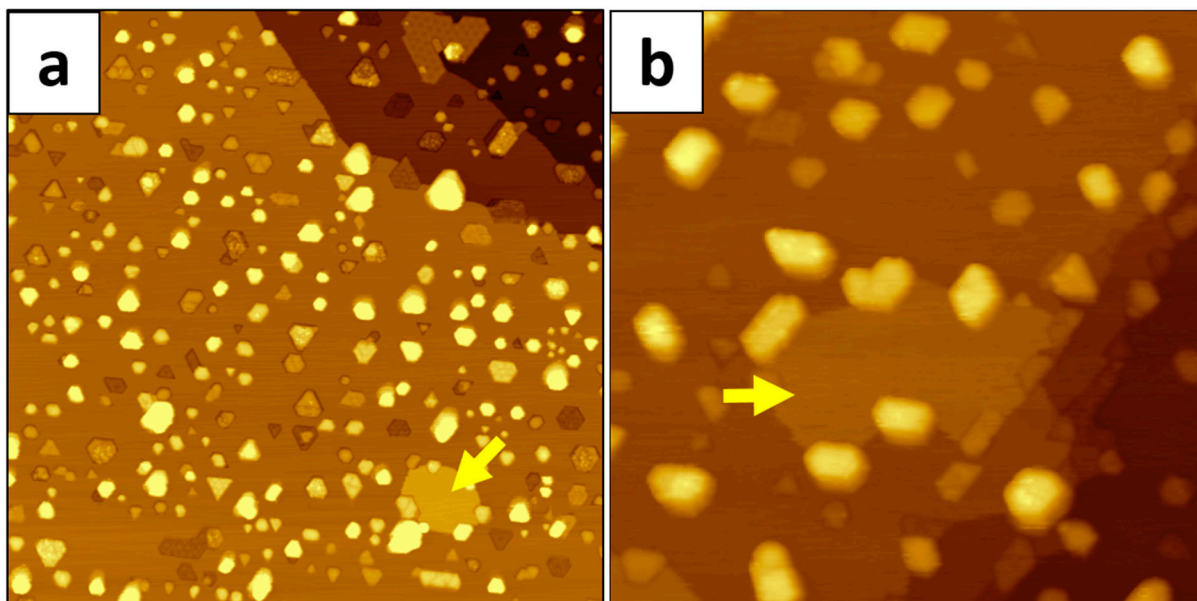

**Figure S1.** STM images of reconstruction-free islands (marked with yellow arrows) observed on different HT-FeO/Ag(111) samples ( $300 \times 300 \text{ nm}^2$ ,  $V = +1.0 \text{ V}$ ,  $I = 0.4 \text{ nA}$  (a) and  $50 \times 50 \text{ nm}^2$ ,  $V = +0.7 \text{ V}$ ,  $I = 0.4 \text{ nA}$  (b)).

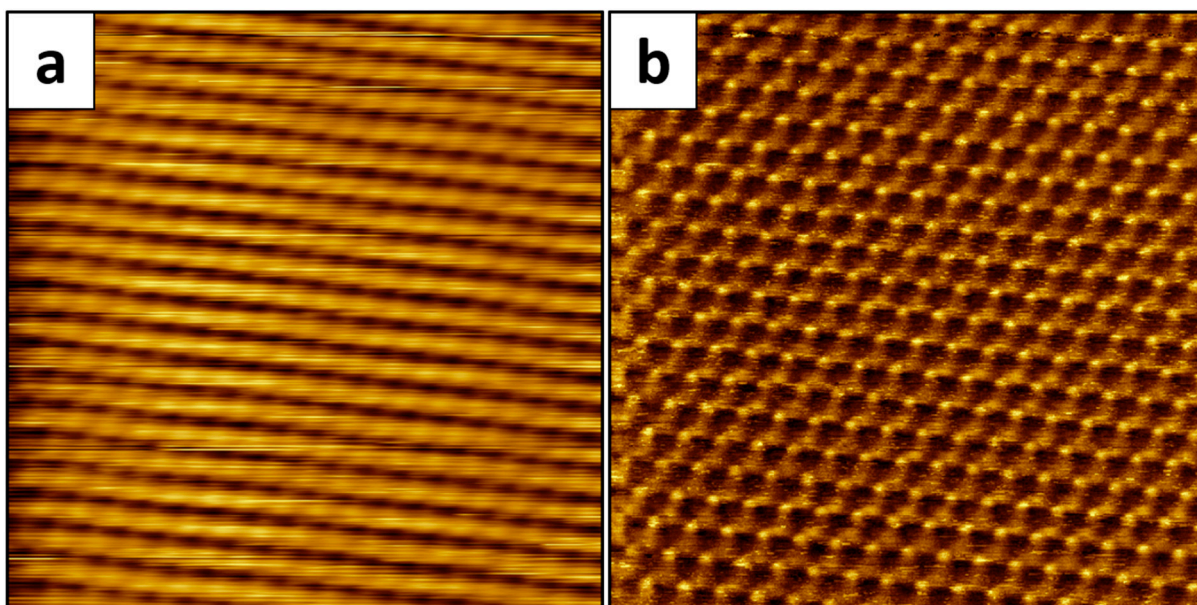

**Figure S2.** Atomic-resolution STM images ( $5 \times 5 \text{ nm}^2$ ) obtained on a reconstruction-free island observed on HT-FeO/Ag(111) sample: Constant-current topography (a) and current map (b) ( $V = +0.1 \text{ V}$ ,  $I = 0.4 \text{ nA}$ ).

Bader charge on atoms (in  $|e|$ ):

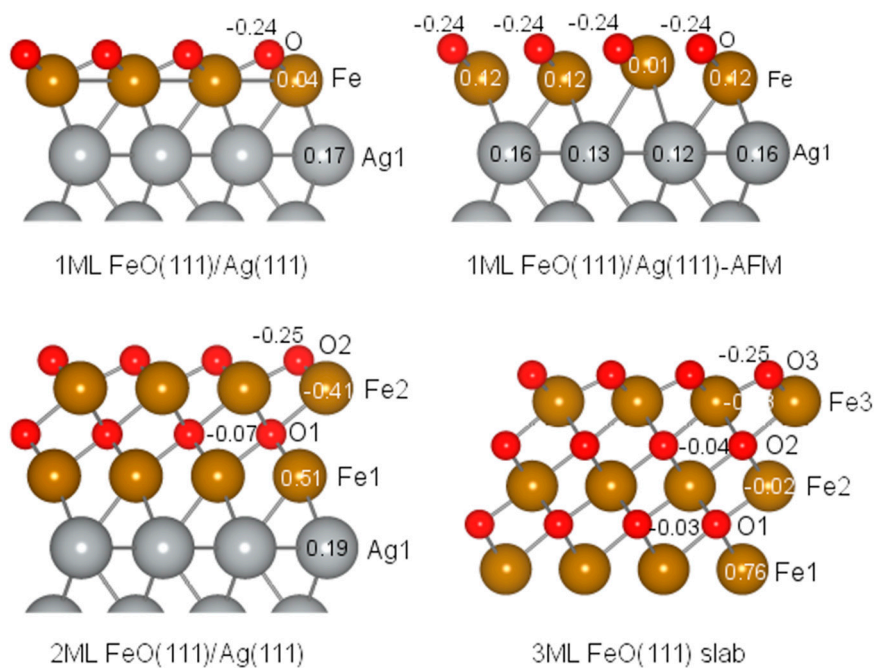

**Figure S3.** Graphical representation of the distribution of Bader charges on atoms calculated for different FeO systems (see SM4).

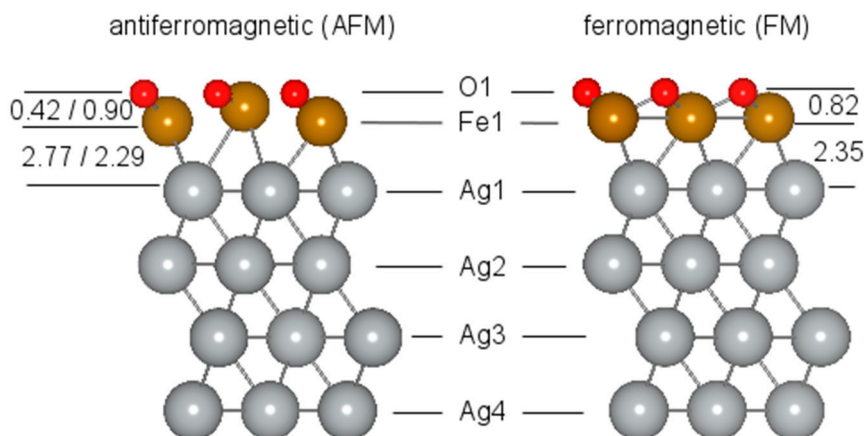

**Figure S4.** Differences in geometry of antiferromagnetic (AFM) and ferromagnetic (FM) superstructures of 1 ML FeO(111) on Ag(111). The AFM alignment of magnetic moments on Fe atoms makes the Fe layer distinctly rumpled, with Fe atoms of one direction of magnetization being by about 0.5  $\text{\AA}$  more distant from the Ag(111) surface than those with opposite magnetization. All distances are given in  $\text{\AA}$ .
